# Supplementary material
Source: publisher site journal article supplement (https://www.dovepress.com/article/567136)
Supplement: Supplementary file 1 [file 567136%20Revised%20Supplementary%20Material.docx]

Supplementary tables:

Table S1. Non-inferiority analysis: The non-inferiority margin is established at 15% based on the estimated probability of relapse/remission during the approved dosing schedule.

| Hypothesis | log(OR) (95% CI) | Bayes factor | Posterior probability | Evidence for hypothesis |
| --- | --- | --- | --- | --- |
| Relapse | | | |  |
| Mepolizumab: 25% dosing schedule extension is non-inferior | −19.4 (−35.0, −6.4) |  | 100.0% | Decisive |
| Mepolizumab: 50% dosing schedule extension is non-inferior | −7.2 (−16.8, −0.8) | 65.2 | 98.5% | Very strong |
| Benralizumab: 25% dosing schedule extension is non-inferior | −21.4 (−39.2, −7.0) |  | 100.0% | Decisive |
| Benralizumab: 50% dosing schedule extension is non-inferior | −4.9 (−12.6, 0.0) | 19.3 | 95.1% | Strong |
| Benralizumab is better than Mepolizumab  at approved dosing schedule | −0.8 (−11.0, 9.2) | 1.2 | 55.3% | None |
| Benralizumab is better than Mepolizumab  at dosing schedule extended by 25% | −2.0 (−18.3, 13.5) | 1.3 | 57.4% | None |
| Benralizumab is better than Mepolizumab  at dosing schedule extended by 50% | 2.2 (−4.0, 9.7) | 0.4 | 27.8% | None |
| Four-component remission | | | |  |
| Mepolizumab: 25% dosing schedule extension is non-inferior | 15.0 (5.2, 27.0) |  | 100.0% | Decisive |
| Mepolizumab: 50% dosing schedule extension is non-inferior | 0.7 (−3.2, 6.1) | 1.2 | 54.0% | None |
| Benralizumab: 25% dosing schedule extension is non-inferior | 5.5 (0.2, 13.2) | 26.7 | 96.4% | Strong |
| Benralizumab: 50% dosing schedule extension is non-inferior | −0.9 (−4.5, 3.0) | 0.4 | 30.4% | None |
| Benralizumab is better than Mepolizumab  at approved dosing schedule | 0.3 (−8.6, 9.4) | 1.1 | 52.1% | None |
| Benralizumab is better than Mepolizumab  at dosing schedule extended by 25% | −9.5 (−20.5, −0.5) |  | 4.1% | Strong (against hypothesis) |
| Benralizumab is better than Mepolizumab  at dosing schedule extended by 50% | −1.6 (−8.0, 3.6) | 0.5 | 33.4% | None |
| Three-component remission | | | |  |
| Mepolizumab: 25% dosing schedule extension is non-inferior | 19.4 (6.4, 34.9) |  | 100.0% | Decisive |
| Mepolizumab: 50% dosing schedule extension is non-inferior | 7.2 (0.8, 16.8) | 66.5 | 98.5% | Very strong |
| Benralizumab: 25% dosing schedule extension is non-inferior | 21.4 (7.0, 39.2) |  | 100.0% | Decisive |
| Benralizumab: 50% dosing schedule extension is non-inferior | 5.0 (0.1, 12.7) | 20.4 | 95.3% | Strong |
| Benralizumab is better than Mepolizumab  at approved dosing schedule | 0.9 (−9.2, 11.1) | 1.2 | 55.5% | None |
| Benralizumab is better than Mepolizumab  at dosing schedule extended by 25% | 2.1 (−13.3, 18.3) | 1.4 | 57.5% | None |
| Benralizumab is better than Mepolizumab  at dosing schedule extended by 50% | −2.2 (−9.8, 4.0) | 0.4 | 27.9% | None |

Table S2. Descriptive data for lung function, ACT scores, eosinophil counts.

| Variable | Visit | | |
| --- | --- | --- | --- |
| 0 weeks*a* | 26th week*a* | 52nd week*a* |
| FEV1 (L) | | | |
| Overall | 2.17 (0.90, 3.48) | 2.25 (0.93, 3.44) | 2.19 (1.01, 3.55) |
| benralizumab | 2.11 (1.63, 3.41) | 2.32 (1.47, 3.22) | 2.16 (1.53, 3.47) |
| mepolizumab | 2.23 (0.90, 3.48) | 2.22 (0.93, 3.44) | 2.24 (1.01, 3.55) |
| FEV1 (%) | | | |
| Overall | 86 (48, 125) | 84 (50, 130) | 84 (45, 113) |
| benralizumab | 98 (71, 125) | 94 (71, 130) | 91 (66, 113) |
| mepolizumab | 85 (48, 120) | 83 (50, 110) | 81 (45, 111) |
| FVC (L) | | | |
| Overall | 3.25 (1.13, 4.79) | 3.38 (1.46, 4.97) | 3.28 (1.52, 4.76) |
| benralizumab | 3.25 (2.21, 4.69) | 3.50 (2.19, 4.97) | 3.24 (2.36, 4.76) |
| mepolizumab | 3.24 (1.13, 4.79) | 3.27 (1.46, 4.77) | 3.39 (1.52, 4.61) |
| FVC (%) (Forced Vital Capacity) | | | |
| Overall | 103 (53, 141) | 98 (60, 139) | 94 (53, 127) |
| benralizumab | 104 (79, 141) | 100 (83, 139) | 101 (80, 127) |
| mepolizumab | 103 (53, 139) | 95 (60, 122) | 89 (53, 125) |
| ACT (Asthma Control Test) | | | |
| Overall | 23 (20, 25) | 24 (20, 25) | 22 (12, 25) |
| benralizumab | 22 (20, 25) | 23 (20, 25) | 22 (12, 25) |
| mepolizumab | 25 (20, 25) | 24 (20, 25) | 23 (14, 25) |
| Exacerbations | | | |
| Overall | 0 (0%) | 0 (0%) | 3 (11%) |
| benralizumab | 0 (0%) | 0 (0%) | 1 (7.7%) |
| mepolizumab | 0 (0%) | 0 (0%) | 2 (13%) |
| Use of OCS (Oral Corticosteroids) | | | |
| Overall | 0 (0%) | 0 (0%) | 1 (3.6%) |
| benralizumab | 0 (0%) | 0 (0%) | 1 (7.7%) |
| mepolizumab | 0 (0%) | 0 (0%) | 0 (0%) |
| Blood eosinophil count (number/10^-6 L) | | | |
| Overall | 50 (0, 230) | 40 (0, 280) | 50 (0, 400) |
| benralizumab | 0 (0, 60) | 0 (0, 30) | 10 (0, 40) |
| mepolizumab | 70 (23, 230) | 100 (40, 280) | 100 (50, 400) |
| FeNO (Fractional exhaled Nitric Oxide) | | | |
| Overall | 36 (5, 144) | 50 (7, 139) | 46 (9, 128) |
| benralizumab | 56 (5, 94) | 58 (10, 139) | 50 (11, 128) |
| mepolizumab | 29 (7, 144) | 47 (7, 121) | 19 (9, 109) |
| ICS dose (Inhaled Corticosteroids) | | | |
| Overall |  |  |  |
| Low | 5 (16%) | 8 (26%) | 8 (29%) |
| Medium | 15 (48%) | 13 (42%) | 11 (39%) |
| High | 11 (35%) | 10 (32%) | 9 (32%) |
| benralizumab |  |  |  |
| Low | 0 (0%) | 2 (15%) | 2 (15%) |
| Medium | 8 (62%) | 7 (54%) | 8 (62%) |
| High | 5 (38%) | 4 (31%) | 3 (23%) |
| mepolizumab |  |  |  |
| Low | 5 (28%) | 6 (33%) | 6 (40%) |
| Medium | 7 (39%) | 6 (33%) | 3 (20%) |
| High | 6 (33%) | 6 (33%) | 6 (40%) |
| *a* Median (Min, Max); n (%) | | | |
